# Supplementary material
Source: MDPI journal article supplement (https://www.mdpi.com/2304-6740/10/11/194)
Supplement: s1 [file s1]

# Synthesis, Structure and Photoluminescence Properties of Cd and Cd-Ln Pentafluorobenzoates with 2,2':6',2'-terpyridine Derivatives

Maxim A. Shmelev <sup>1</sup>, Julia K. Voronina <sup>1</sup>, Maxim A. Evtyukhin <sup>2</sup>, Fedor M. Dolgushin <sup>1</sup>, Evgenia A. Varaksina <sup>3</sup>, Ilya V. Taydakov <sup>3</sup>, Aleksey A. Sidorov <sup>1</sup>, Igor L. Eremanko <sup>1</sup> and Mikhail A. Kiskin <sup>1,\*</sup>

<sup>1</sup> N. S. Kurnakov Institute of General and Inorganic Chemistry, Russian Academy of Sciences, 31 Leninsky prosp., 119991 Moscow, Russia

<sup>2</sup> Department of Chemistry and Technology of Rare Elements, M.V. Lomonosov Institute of Fine Chemical Technologies, MIREA – Russian Technological University, 78 Vernadsky Avenue, 119454 Moscow, Russia

<sup>3</sup> P. N. Lebedev Physical Institute, Russian Academy of Sciences, 53 Leninsky prosp., 119991 Moscow, Russia

\* Correspondence: mkiskin@igic.ras.ru

- I. Supplementary PXRD data
- II. Supplementary synthetic data
- III. Supplementary structural data
- IV. Supplementary Photoluminescence data

## I. Supplementary PXRD data

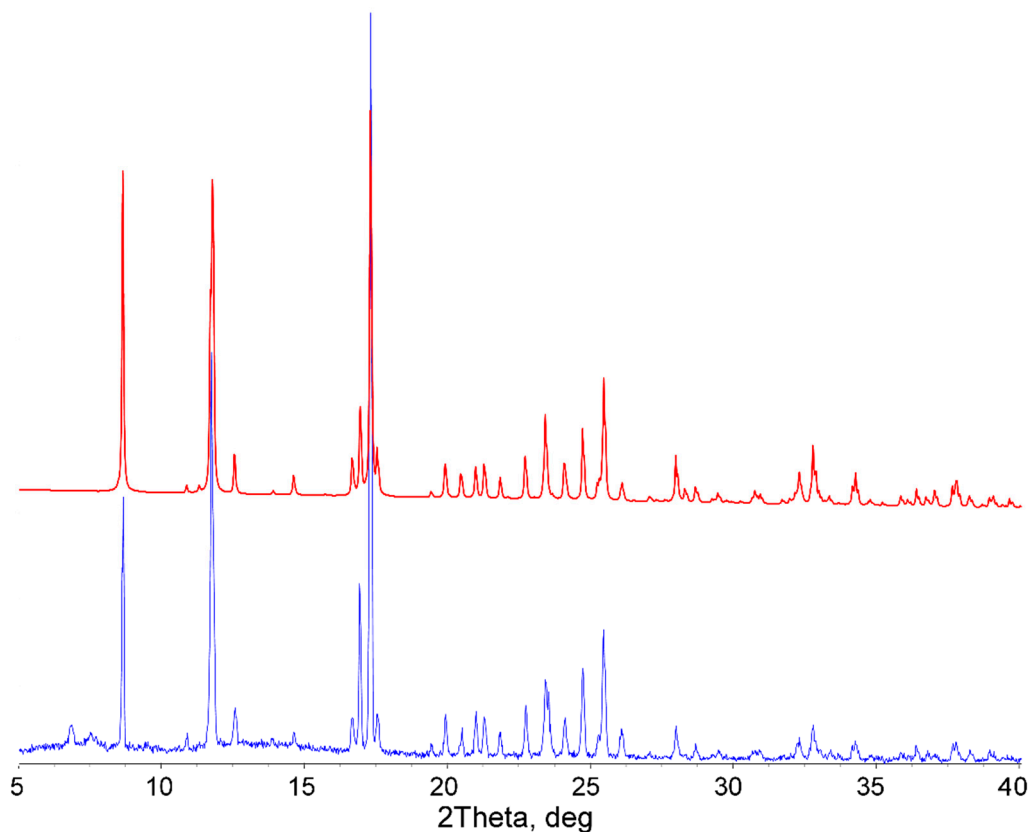

**Figure S1** – XRD patterns comparison for calculated (red) and experimental polycrystalline sample of 1 (blue).

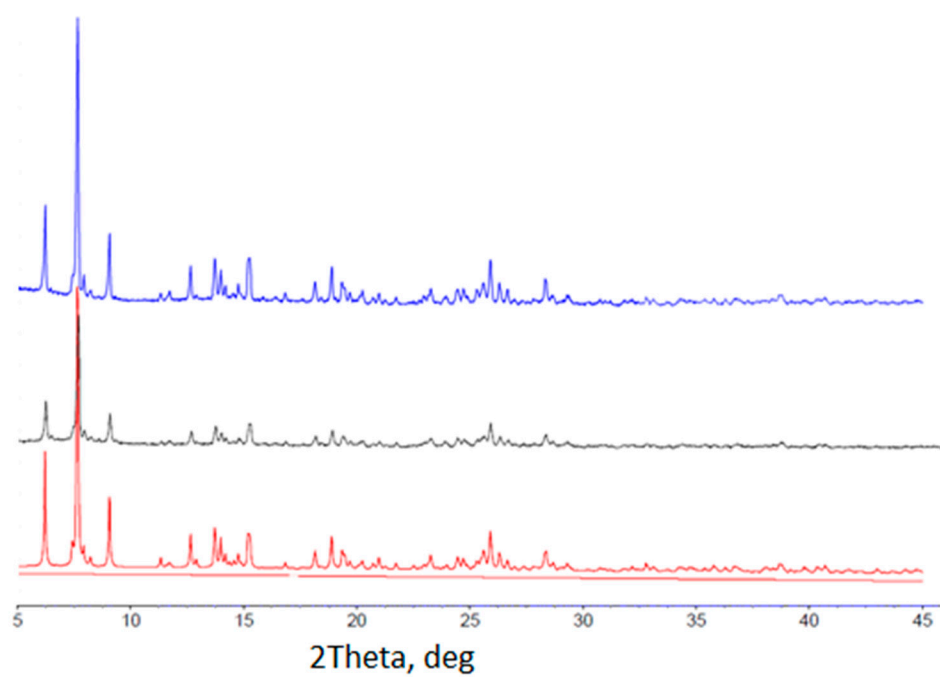

**Figure S2** – XRD patterns comparison for calculated (red) and experimental polycrystalline samples of 2Eu (blue) and 2Tb (black).

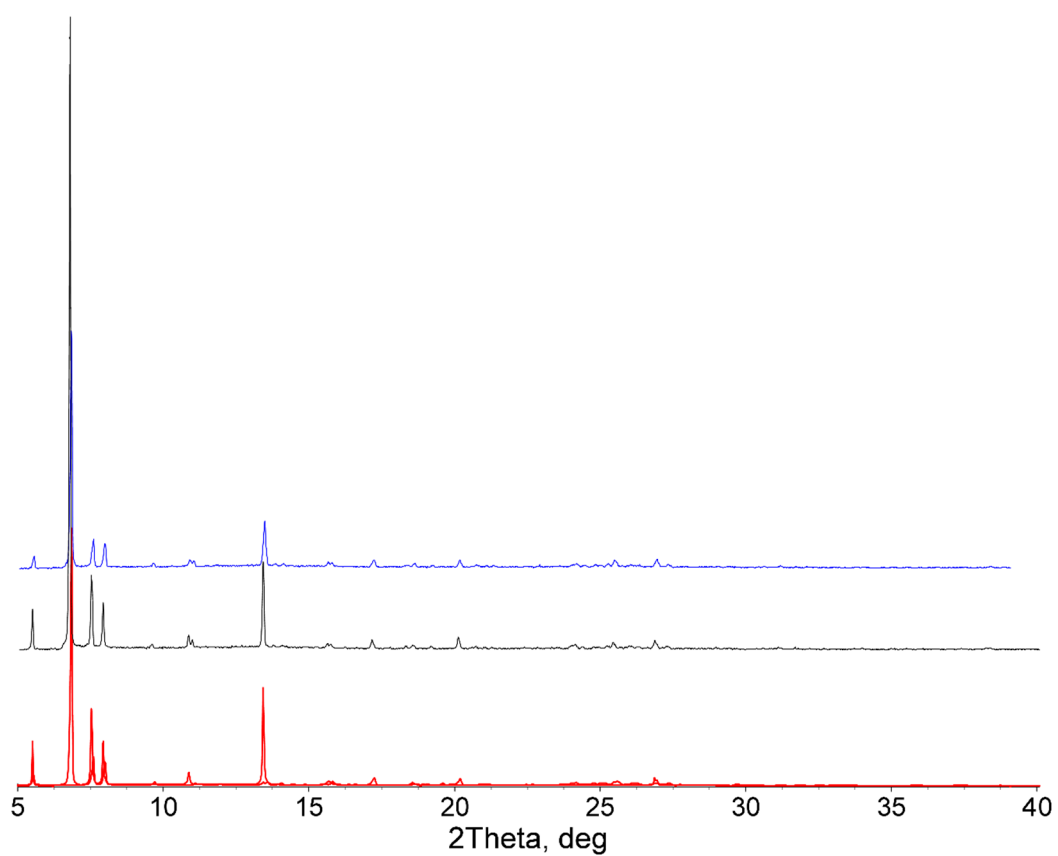

**Figure S3** – XRD patterns comparison for calculated (red) and experimental polycrystalline samples of  $3_{Eu}$  (blue) and  $3_{Tb}$  (black).

## II. Supplementary synthetic data

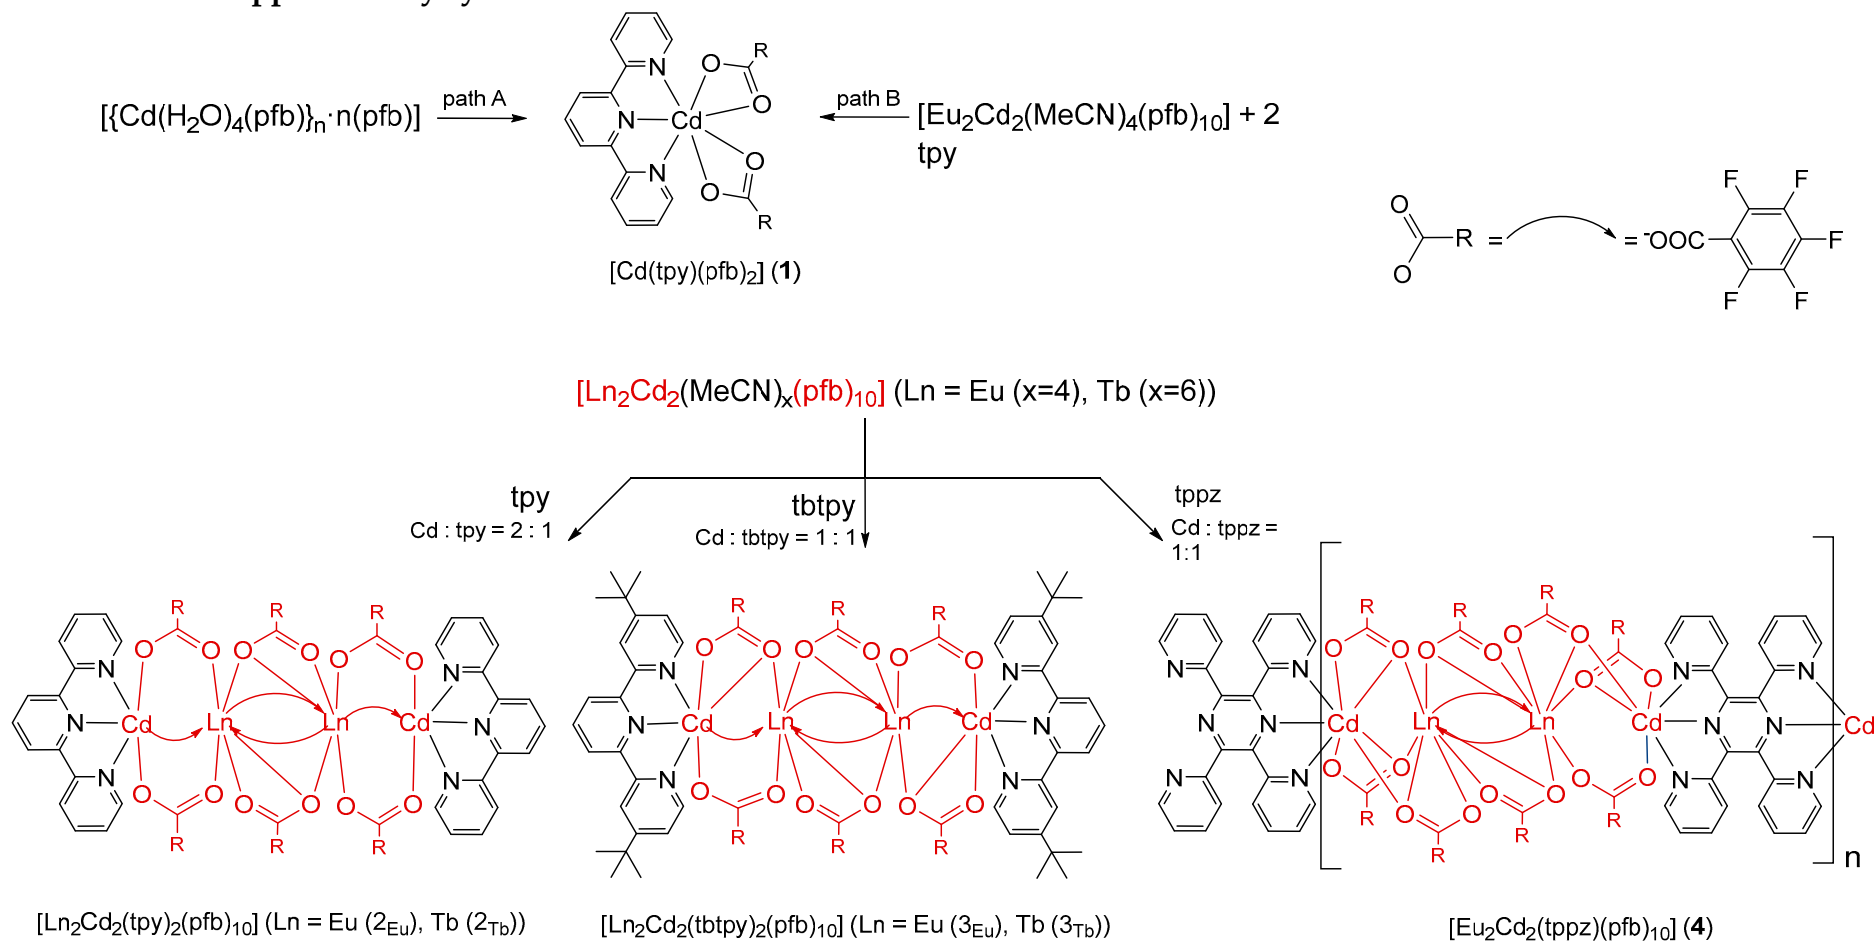

**Scheme S1.** Synthesis of complexes 1-4.

### III. Supplementary structural data

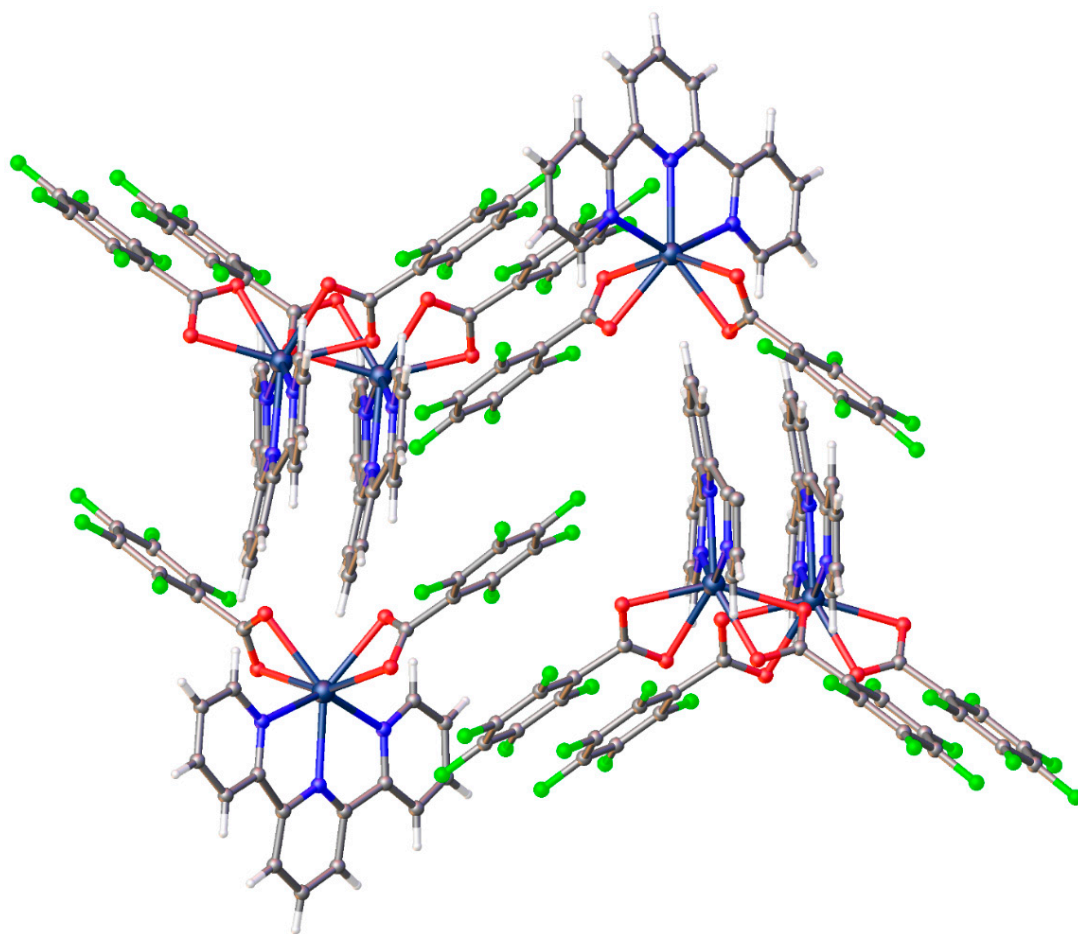

Figure S4. Fragment of the crystal packing of 1.

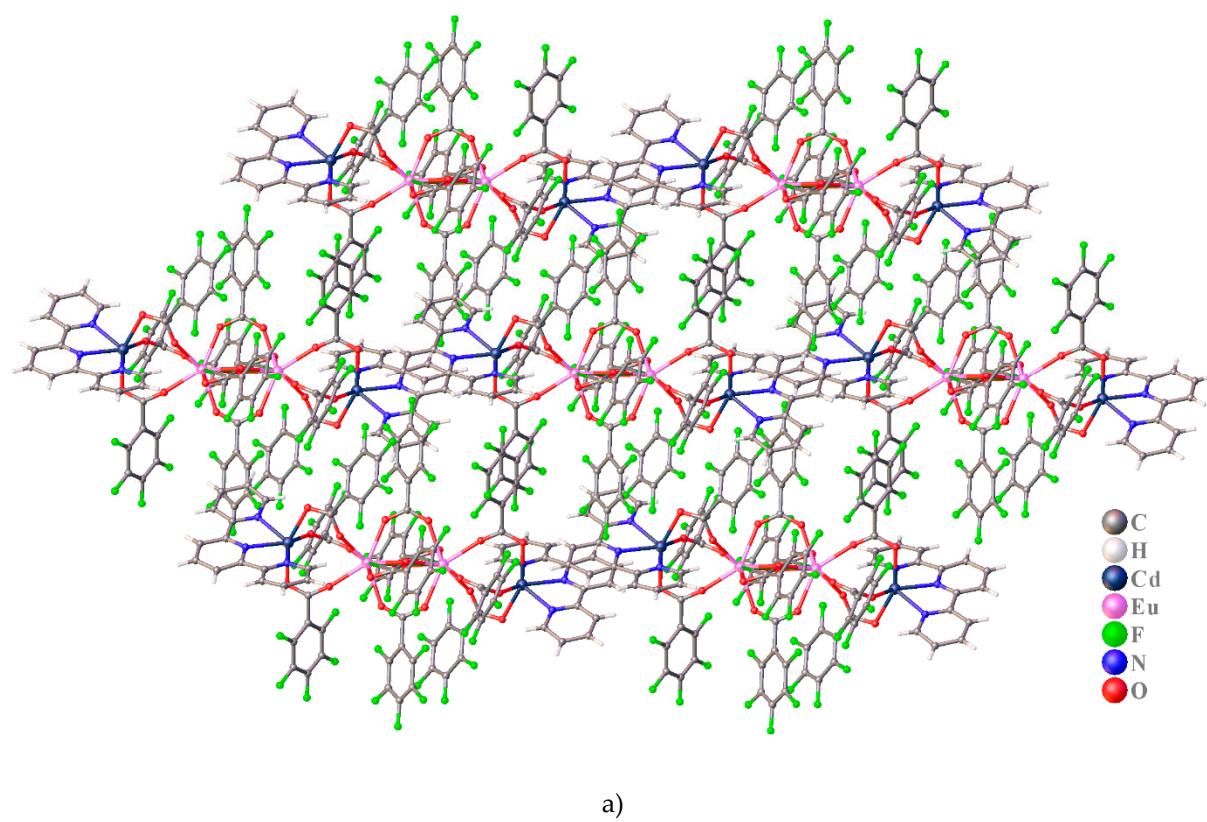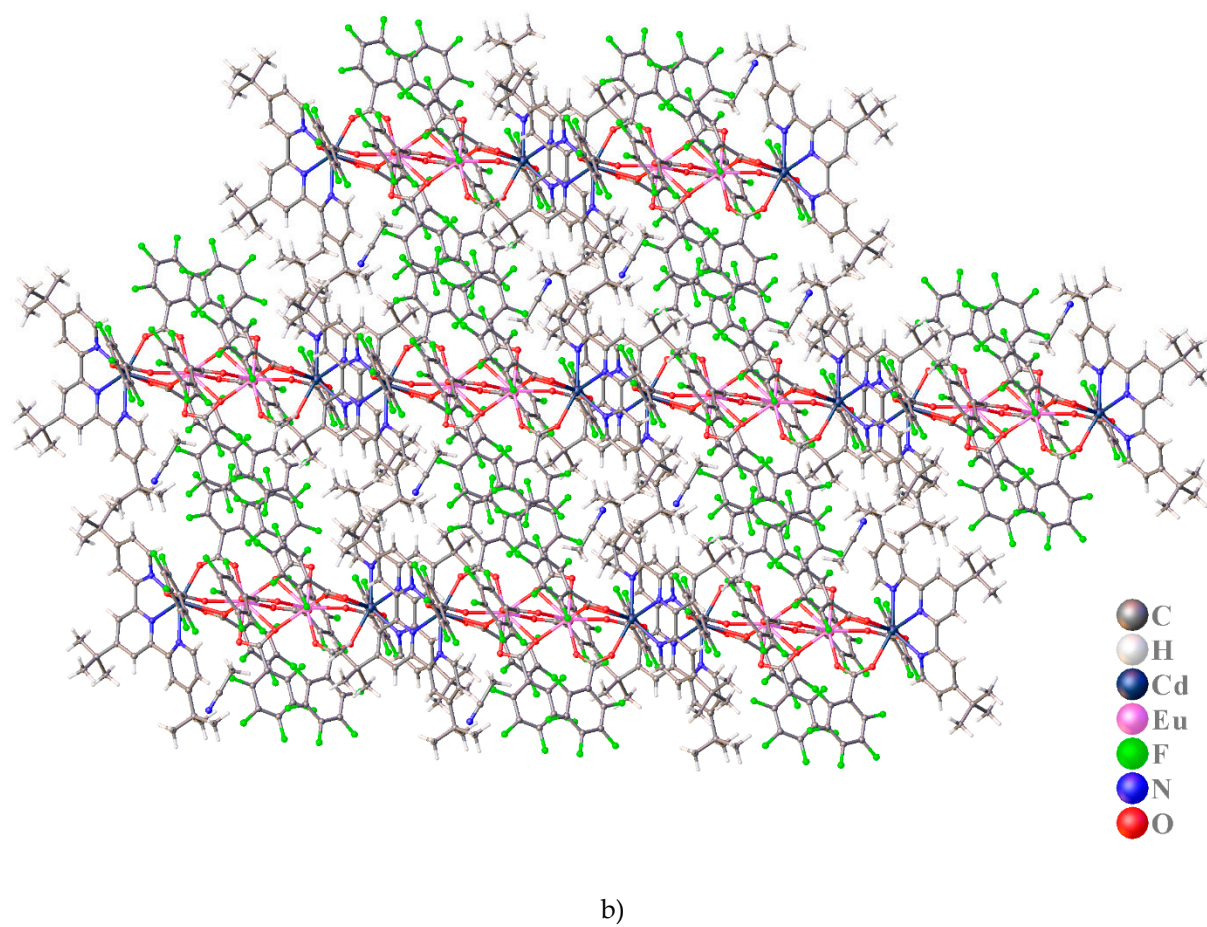

**Figure S5.** Fragments of the crystal packing of  $2_{Eu}$  (a) и  $3_{Eu}$  (b). Projections along plane a are shown.

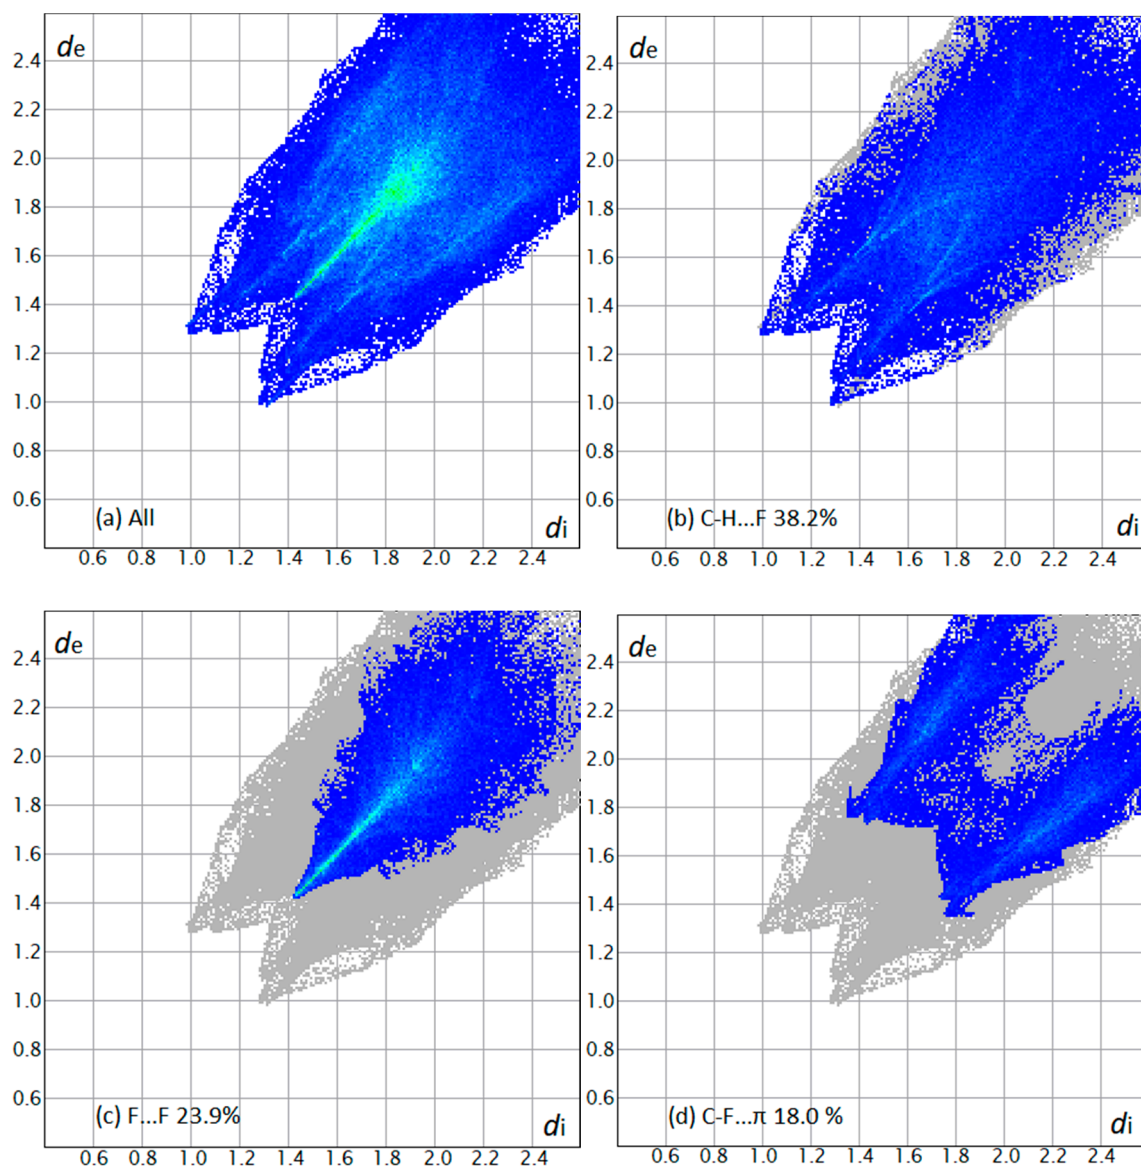

**Figure S6.** 2D fingerprint plots (a) and sections of the graph, which correspond to C-H...F(b), F...F(c) and C-F... $\pi$ (d) interactions in the structure  $2_{Eu}$



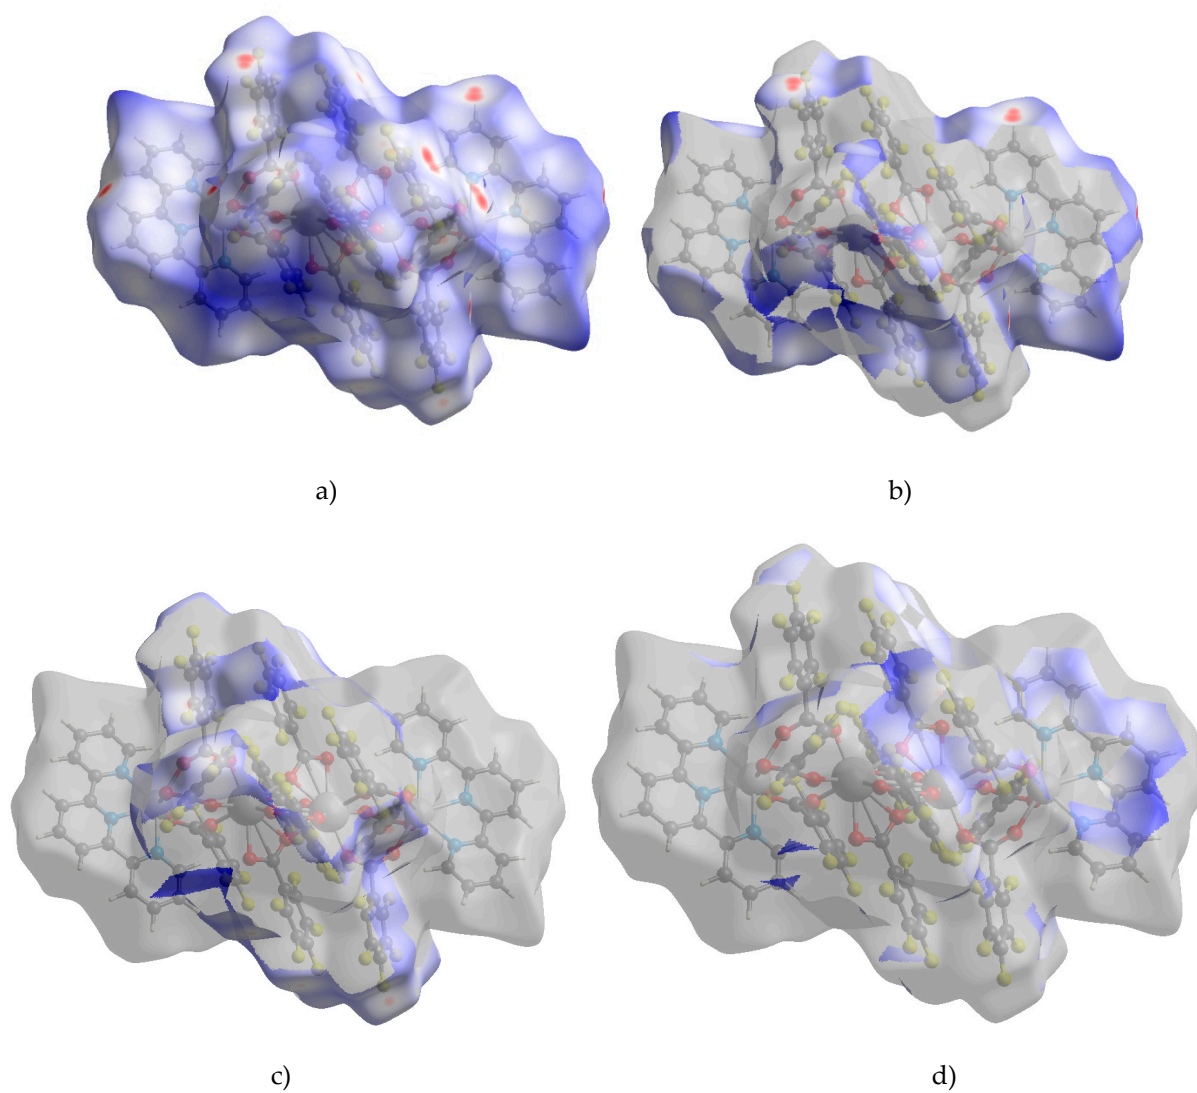

**Figure S7.** Hirshfeld surface (a) and contribution of C-H...F(b), F...F(c) and C-H...  $\pi$ (d) interactions in structure 2<sub>Eu</sub>.



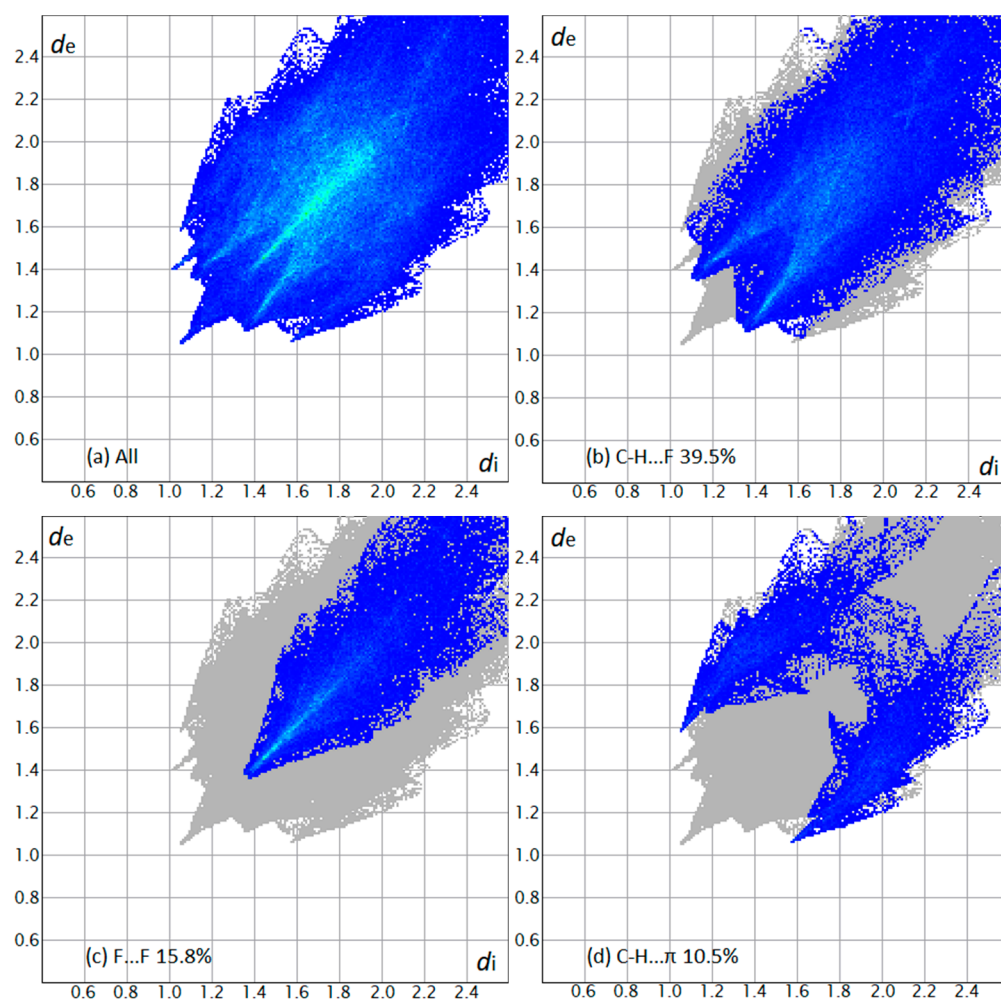

**Figure S8.** 2D fingerprint plots (a) and sections of the graph, which correspond to C-H...F(b), F...F(c) и C-H...  $\pi$ (d) interactions in the structure  $3_{Eu}$ .

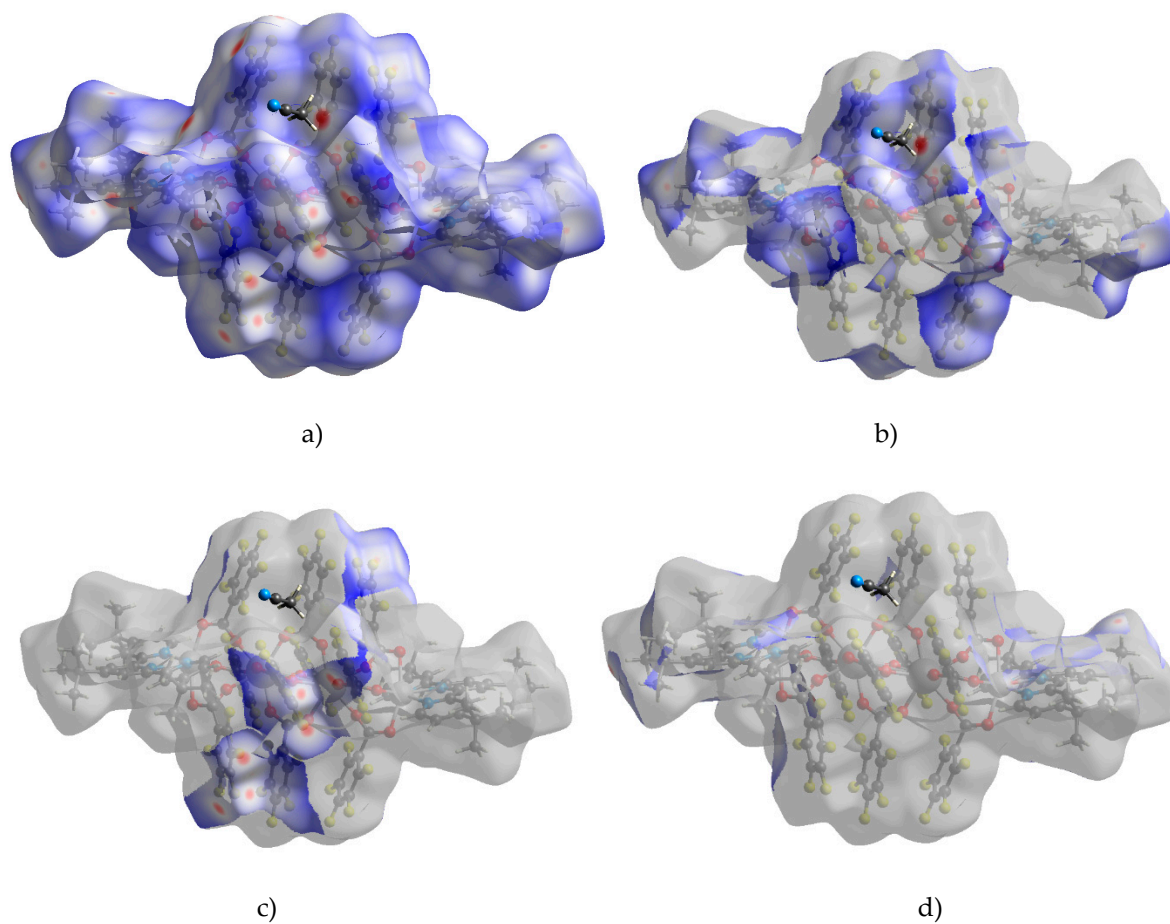

**Figure S9.** Hirshfeld surface (a) and contribution of C-H...F(b), F...F(c) and C-H...  $\pi$ (d) interactions in structure 3<sub>Eu</sub>.

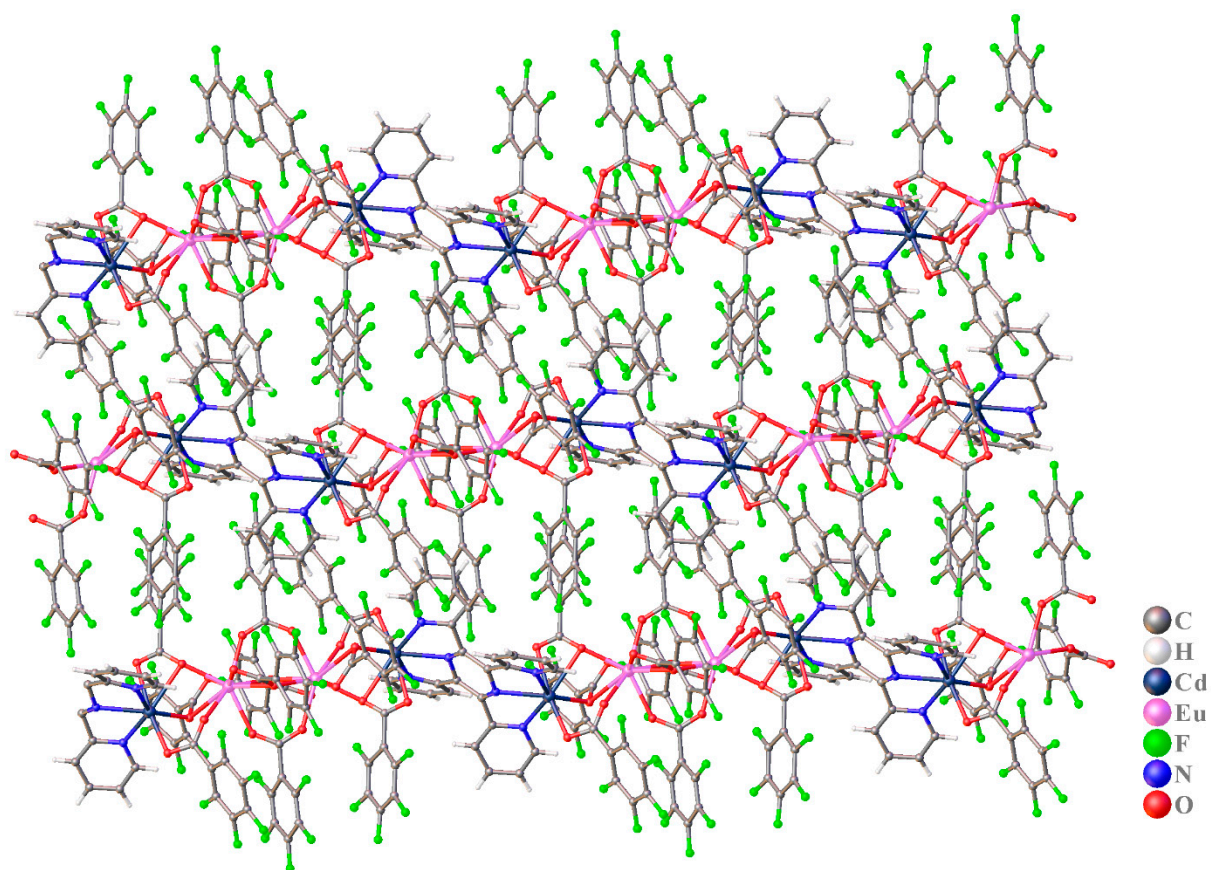

**Figure S10.** Fragment of the crystal packing of 4. Projections along plane a are shown.

**Table S1.** The main crystallography data and refinement details for structures 1, 2<sub>Eu</sub>, 3<sub>Eu</sub> and 4.

| Parameter                                                                                          | 1            | 2 <sub>Eu</sub>    | 3 <sub>Eu</sub>    | 4                  |
|----------------------------------------------------------------------------------------------------|--------------|--------------------|--------------------|--------------------|
| Formula weight (g·mol <sup>-1</sup> )                                                              | 767.81       | 3105.95            | 3524.68            | 3027.85            |
| <i>T</i> , K                                                                                       | 120          | 296                | 100                | 296                |
| Crystal system                                                                                     | Orthorhombic | Triclinic          | Triclinic          | Triclinic          |
| Space group                                                                                        | <i>Pnna</i>  | <i>P</i> $\bar{1}$ | <i>P</i> $\bar{1}$ | <i>P</i> $\bar{1}$ |
| <i>a</i> , Å                                                                                       | 16.1677(7)   | 14.3318(5)         | 14.219(2)          | 14.1316(16)        |
| <i>b</i> , Å                                                                                       | 20.2820(9)   | 14.4293(5)         | 15.455(3)          | 14.5434(18)        |
| <i>c</i> , Å                                                                                       | 8.4259(4)    | 15.8527(7)         | 16.941(3)          | 14.9932(18)        |
| $\alpha$ , °                                                                                       | 90           | 81.9780(10)        | 76.287(6)          | 74.804(4)          |
| $\beta$ , °                                                                                        | 90           | 66.3180(10)        | 72.339(5)          | 66.842(4)          |
| $\gamma$ , °                                                                                       | 90           | 65.5510(10)        | 71.076(5)          | 64.748(3)          |
| <i>V</i> , Å <sup>3</sup>                                                                          | 2763.0(2)    | 2731.62(18)        | 3315.8(10)         | 2545.9(5)          |
| <i>Z</i>                                                                                           | 4            | 1                  | 1                  | 1                  |
| <i>d</i> <sub>calc</sub> , g·cm <sup>-3</sup>                                                      | 1.846        | 1.888              | 1.765              | 1.975              |
| $\mu$ , cm <sup>-1</sup>                                                                           | 0.901        | 1.672              | 1.389              | 1.791              |
| $\theta_{\max}$ (deg)                                                                              | 29.999       | 25.997             | 26.000             | 26.000             |
| <i>T</i> <sub>min</sub> / <i>T</i> <sub>max</sub>                                                  | 0.693/ 0.900 | 0.653/ 0.746       | 0.551/0.746        | 0.631/0.746        |
| Reflections measured                                                                               | 34631        | 27362              | 17522              | 23029              |
| Independent reflections                                                                            | 4034         | 10707              | 12505              | 9957               |
| Reflections with <i>I</i> > 2 <i>s</i> ( <i>I</i> )                                                | 2851         | 7977               | 8409               | 4470               |
| <i>R</i> <sub>int</sub>                                                                            | 0.0605       | 0.0947             | 0.0490             | 0.1275             |
| GOOF                                                                                               | 1.044        | 1.021              | 1.039              | 0.966              |
| <i>R</i> <sub>1</sub> ( <i>I</i> > 2σ( <i>I</i> ))                                                 | 0.0330       | 0.0553             | 0.0784             | 0.0781             |
| <i>wR</i> <sub>2</sub> ( <i>I</i> > 2σ( <i>I</i> ))                                                | 0.0737       | 0.1415             | 0.2229             | 0.1897             |
| Residual electron density, e·Å <sup>-3</sup> ( <i>d</i> <sub>min</sub> / <i>d</i> <sub>max</sub> ) | −0.401/0.438 | −1.538/2.039       | −2.547/2.754       | −1.264/0.850       |

**Table S2.** Continuous Shape Measures (CShM) values for the potential coordination polyhedron of Eu and Cd atoms in 1, 2<sub>Eu</sub>, 3<sub>Eu</sub> and 4.

|                 | Cd                                                                                                         | Eu                                                                                                                        |
|-----------------|------------------------------------------------------------------------------------------------------------|---------------------------------------------------------------------------------------------------------------------------|
| 1               | Pentagonal bipyramid, D5h (5.828)<br>Capped trigonal prism, C2v, (6.094)<br>Capped octahedron, C3v (7.539) | -                                                                                                                         |
| 2 <sub>Eu</sub> | Trigonal prism, D3h (3.330)<br>Octahedron, Oh (11.257)<br>Pentagonal pyramid, C5v (13.341)                 | Square antiprism, D4d (1.418)<br>Triangular dodecahedron, D2d (1.802)<br>Biaugmented trigonal prism, C2v, (2.408)         |
| 3 <sub>Eu</sub> | Capped trigonal prism, C2v (4.434)<br>Pentagonal bipyramid, D5h (4.671)<br>Capped octahedron, C3v (4.986)  | Triangular dodecahedron, D2d (1.417)<br>Square antiprism, D4d (1.917)<br>Biaugmented trigonal prism, C2v (2.188)          |
| 4               | Snub disphenoid, D2d (4.884)<br>Square antiprism, D2d (5.294)<br>Biaugmented trigonal prism, C2v (5.796)   | Capped square antiprism, C4v (2.011)<br>Capped square antiprism J10, C4v (2.716)<br>Tricapped trigonal prism, D3d (3.046) |

**Table S3** Table of C-F...  $\pi$  interactions in the crystal packing of 1, 2<sub>Eu</sub>, 3<sub>Eu</sub> and 4.

| Interaction     | F...Cg, Å | F-Perp, Å | Gamma, ° | C-F- Cg, ° | C..Cg, Å  |
|-----------------|-----------|-----------|----------|------------|-----------|
| 1               |           |           |          |            |           |
| C5-F5... Cg2    | 3.458(5)  | 3.223     | 21.20    | 53.05      | 4.762(5)  |
| C6-F6... Cg1    | 3.179(3)  | 3.161     | 6.12     | 47.22      | 4.323(4)  |
| 2 <sub>Eu</sub> |           |           |          |            |           |
| C4-F4...Cg6     | 3.516(12) | 3.168     | 25.70    | 0.71       | 4.184(18) |
| C19-F19...Cg2   | 2.841(8)  | 2.829     | 2.69     | 58.06      | 4.024(11) |
| C20-F20...Cg10  | 3.383(8)  | 3.120     | 22.74    | 9.39       | 3.467(12) |
| C26-F26...Cg9   | 3.328(10) | 3.254     | 12.09    | 0.65       | 3.734(16) |
| 3 <sub>Eu</sub> |           |           |          |            |           |
| C4-F4...Cg1     | 3.776(9)  | 3.282     | 29.62    | 144.0(7)   | 4.929(14) |
| C6-F6...Cg7     | 3.384(10) | 3.325     | 10.61    | 83.8(7)    | 3.499(13) |
| C14-F14...Cg1   | 3.492(8)  | 3.057     | 28.94    | 121.6(6)   | 4.332(13) |
| C28-F28...Cg4   | 3.459(8)  | 3.442     | 5.64     | 83.7(5)    | 3.563(11) |
| 4               |           |           |          |            |           |
| C6-F6...Cg3     | 3.322(12) | -3.270    | 10.17    | 49.98      | 4.480(15) |
| C18-F18...Cg8   | 3.523(17) | -3.504    | 6.08     | 6.08       | 3.84(2)   |
| C26-F26...Cg7   | 3.585(16) | -3.441    | 16.29    | 1.13       | 3.79(3)   |
| C32-F32...Cg1   | 3.618(15) | -3.306    | 23.95    | 27.01      | 4.76(2)   |

**Table S4** Parameters of hydrogen bonds in the crystal packing of 1, 2<sub>Eu</sub> and 3<sub>Eu</sub>.

| Hydrogen bond   | Symmetry code | D – H, Å | H...A, Å | D...A, Å  | D – H– A, ° |
|-----------------|---------------|----------|----------|-----------|-------------|
| 1               |               |          |          |           |             |
| C8-H8A... O2    |               | 0.95     | 2.50     | 3.108(3)  | 122         |
| C9-H9A... O1    | x,y,-1+z      | 0.95     | 2.58     | 3.405(4)  | 146         |
| C11-H11A... O2  | -1/2+x,y,-z   | 0.95     | 2.48     | 3.424(4)  | 176         |
| C14'-H14B... O2 | -1/2+z,y,-z   | 0.95     | 2.27     | 3.178(6)  | 159         |
| 2 <sub>Eu</sub> |               |          |          |           |             |
| C36-H36...O6    |               | 0.93     | 2.39     | 3.126(12) | 135         |
| C38-H38...F13   | 1+x,y,z       | 0.93     | 2.46     | 2.993(19) | 116         |
| C43-H43...F14   | -x,2-y,2-z    | 0.93     | 2.43     | 3.233(16) | 145         |
| C44-H44...O1    | -x,2-y,2-z    | 0.93     | 2.46     | 3.342(14) | 159         |
| C50-H50...O3    |               | 0.93     | 2.40     | 2.933(11) | 116         |
| 3 <sub>Eu</sub> |               |          |          |           |             |
| C36-H36...O2    |               | 0.95     | 2.50     | 3.281(13) | 139         |
| C3S-H3SA...F35  |               | 0.98     | 2.34     | 3.01(3)   | 124         |
| C36-H36...O10   | 1-x,1-y,1-z   | 0.95     | 2.32     | 3.009(12) | 129         |
| C50-H50...O5    |               | 0.95     | 2.47     | 3.010(12) | 116         |
| C58-H58...F10   | 1-x,-y,2-z    | 0.98     | 2.55     | 3.257(15) | 129         |

**Table S5.** The main geometric characteristics of 1, 2<sub>Eu</sub>, 3<sub>Eu</sub> and 4.

| Bond                                                   | Values             |                   |                   |                    |
|--------------------------------------------------------|--------------------|-------------------|-------------------|--------------------|
|                                                        | 1                  | 2 <sub>Eu</sub>   | 3 <sub>Eu</sub>   | 4                  |
| Cd–N (L)                                               | 2.342(3), 2.385(2) | 2.338(6)–2.419(7) | 2.366(8)–2.408(7) | 2.367(11)–2.421(9) |
| Cd–O (C <sub>6</sub> F <sub>5</sub> COO <sup>-</sup> ) | 2.375(2), 2.436(2) | 2.302(6)–2.328(6) | 2.299(6)–2.677(7) | 2.252(9)–2.760(9)  |
| Ln–O (C <sub>6</sub> F <sub>5</sub> COO <sup>-</sup> ) | -                  | 2.292(4)–2.555(4) | 2.291(6)–2.613(6) | 2.355(9)–2.643(9)  |
| Cd...Cd                                                | 9.116(1)           | 7.890(1)          | 8.511(2)          | 7.175(3)           |
| Cd...Eu                                                | -                  | 4.239(1)          | 4.209(1)          | 3.751(1)           |
| Eu...Eu                                                | -                  | 3.895(1)          | 3.999(1)          | 3.902(1)           |
| Angle                                                  | ω, deg             |                   |                   |                    |
| Cd-Eu-Eu                                               | -                  | 165.7(1)          | 172.7(2)          | 166.5(1)           |

**Table S6** Table of F... F interactions in the crystal packing of complexes 2<sub>Eu</sub>, 3<sub>Eu</sub> and 4.

| Interaction     | F...F, Å  | Symmetry code | % of sum of Van der Waals radii |
|-----------------|-----------|---------------|---------------------------------|
| 2 <sub>Eu</sub> |           |               |                                 |
| F3...F28        | 2.868(9)  |               | 97.5                            |
| F10...F35       | 2.751(10) | 1-x,1-y,1-z   | 93.5                            |
| F12...F21       | 2.872(12) | -x,2-y,1-z    | 97.6                            |
| F14...F5        | 2.900(13) | -x,1-y,2-z    | 98.6                            |
| F18...F25       | 2.892(12) | 1+x,y,z       | 98.3                            |
| 3 <sub>Eu</sub> |           |               |                                 |
| F5...F27        | 2.908(11) | 1-x,1-y,1-z   | 98.9                            |
| F12...F19       | 2.745(10) | 1+x,y,z       | 93.3                            |
| F13...F32       | 2.786(14) | 1+x,y,z       | 94.7                            |
| F21...F24       | 2.750(10) |               | 93.5                            |
| F28...F31       | 2.927(10) | 1-x,1-y,1-z   | 99.5                            |
| 4               |           |               |                                 |
| F4...F25        | 2.830(20) | -1+x,y,z      | 96.2                            |
| F6...F12        | 2.917(17) | 2-x,-y,1-z    | 99.2                            |
| F13...F19       | 2.849(19) | 1-x,1-y,2-z   | 96.9                            |
| F28...F35       | 2.911(16) |               | 99.0                            |



#### IV. Supplementary Photoluminescence data

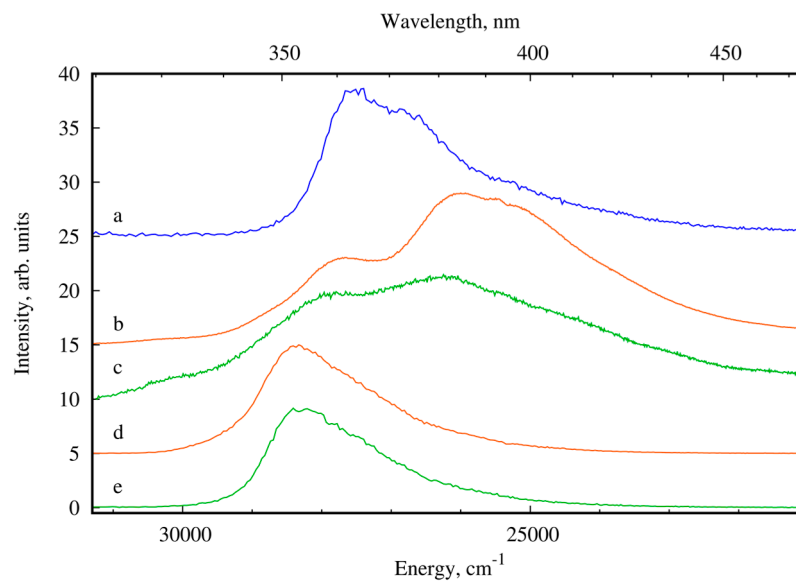

**Figure S11.** Luminescence spectra of complexes **1** (a), **2<sub>Eu</sub>** (b), **2<sub>Tb</sub>** (c), **3<sub>Eu</sub>** (d) and **3<sub>Tb</sub>** (e) at  $\lambda_{\text{exc}} = 280$  nm and  $T = 300$  K. The luminescence bands of the *d*-block are shown on the spectra.
